# Supplementary material for: Construction and Validation of a Regulatory Network for Pluripotency and Self-Renewal of Mouse Embryonic Stem Cells
Source: PLOS journal article supplement (doi:10.1371/journal.pcbi.1003777), 2014-08-14
Supplement: S1 (10.1371/journal.pcbi.1003777.s001) [file journal.pcbi.1003777.s001]

**A**

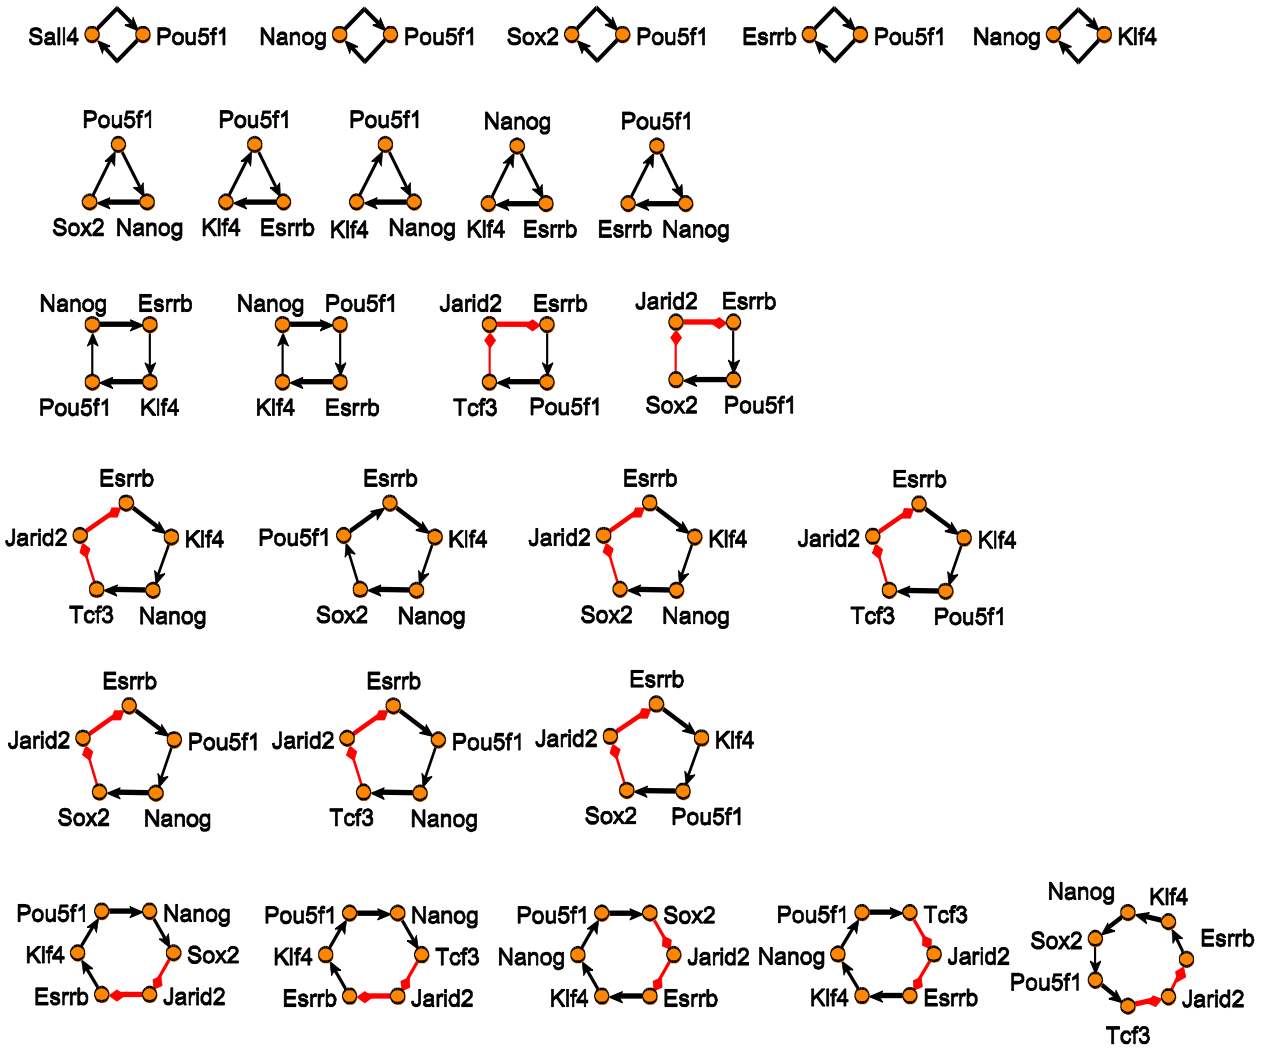

**B**

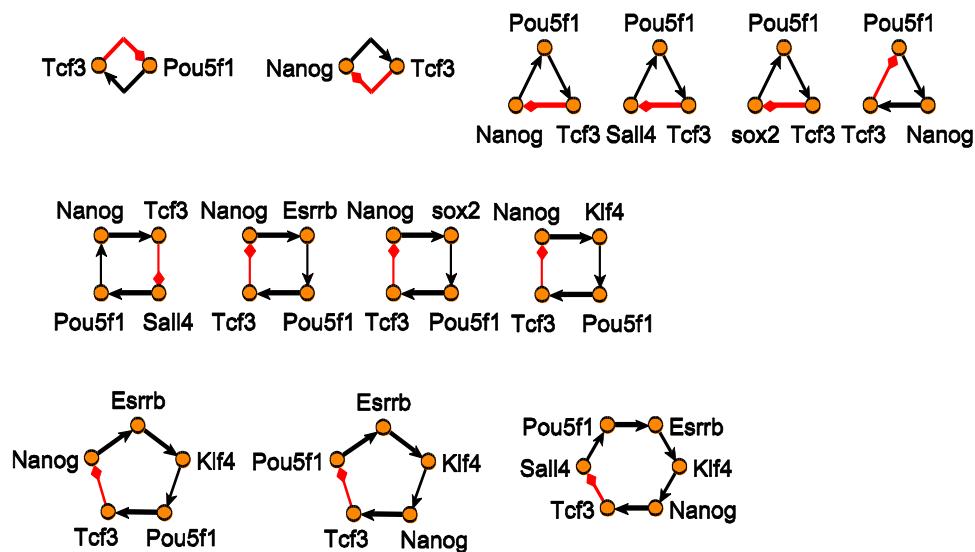

### Figure S1. Summary of feedback loops

Enumeration of (A) positive and (B) negative feedback loops in the pre-learning network. Black edges with standard arrowhead indicate activation; red edges with square arrowhead indicate repression.
