# Supplementary material for: Construction and Validation of a Regulatory Network for Pluripotency and Self-Renewal of Mouse Embryonic Stem Cells
Source: PLOS journal article supplement (doi:10.1371/journal.pcbi.1003777), 2014-08-14
Supplement: S3 (10.1371/journal.pcbi.1003777.s003) [file journal.pcbi.1003777.s003]

301 Moved Permanently

# Moved Permanently

The document has moved here.

---

Apache Server at www.ploscompbiol.org Port 80
