# Supplementary material for: Construction and Validation of a Regulatory Network for Pluripotency and Self-Renewal of Mouse Embryonic Stem Cells
Source: PLOS journal article supplement (doi:10.1371/journal.pcbi.1003777), 2014-08-14
Supplement: S3 (10.1371/journal.pcbi.1003777.s003) [file journal.pcbi.1003777.s003]

A

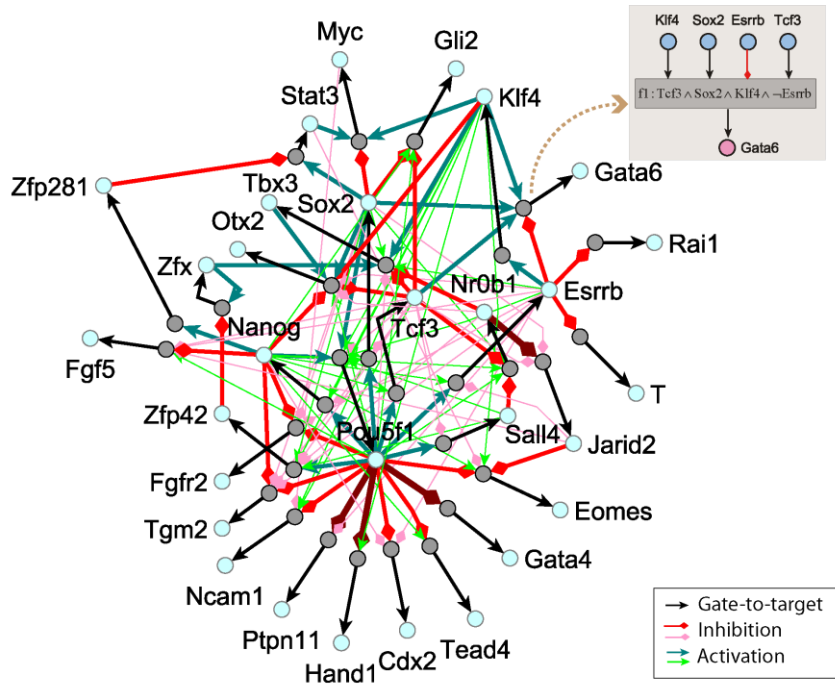

B

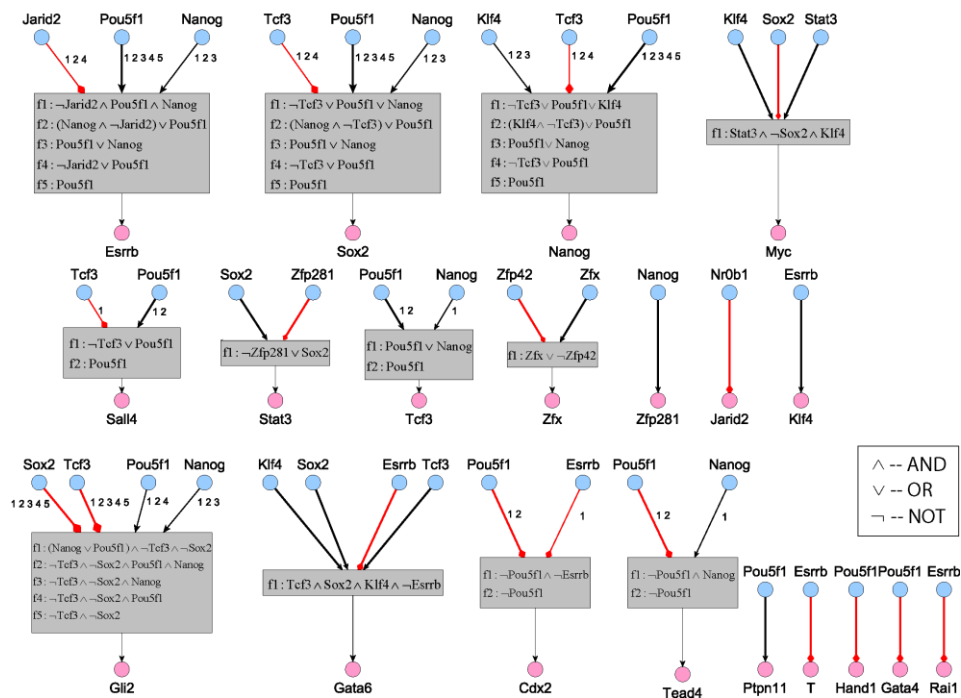

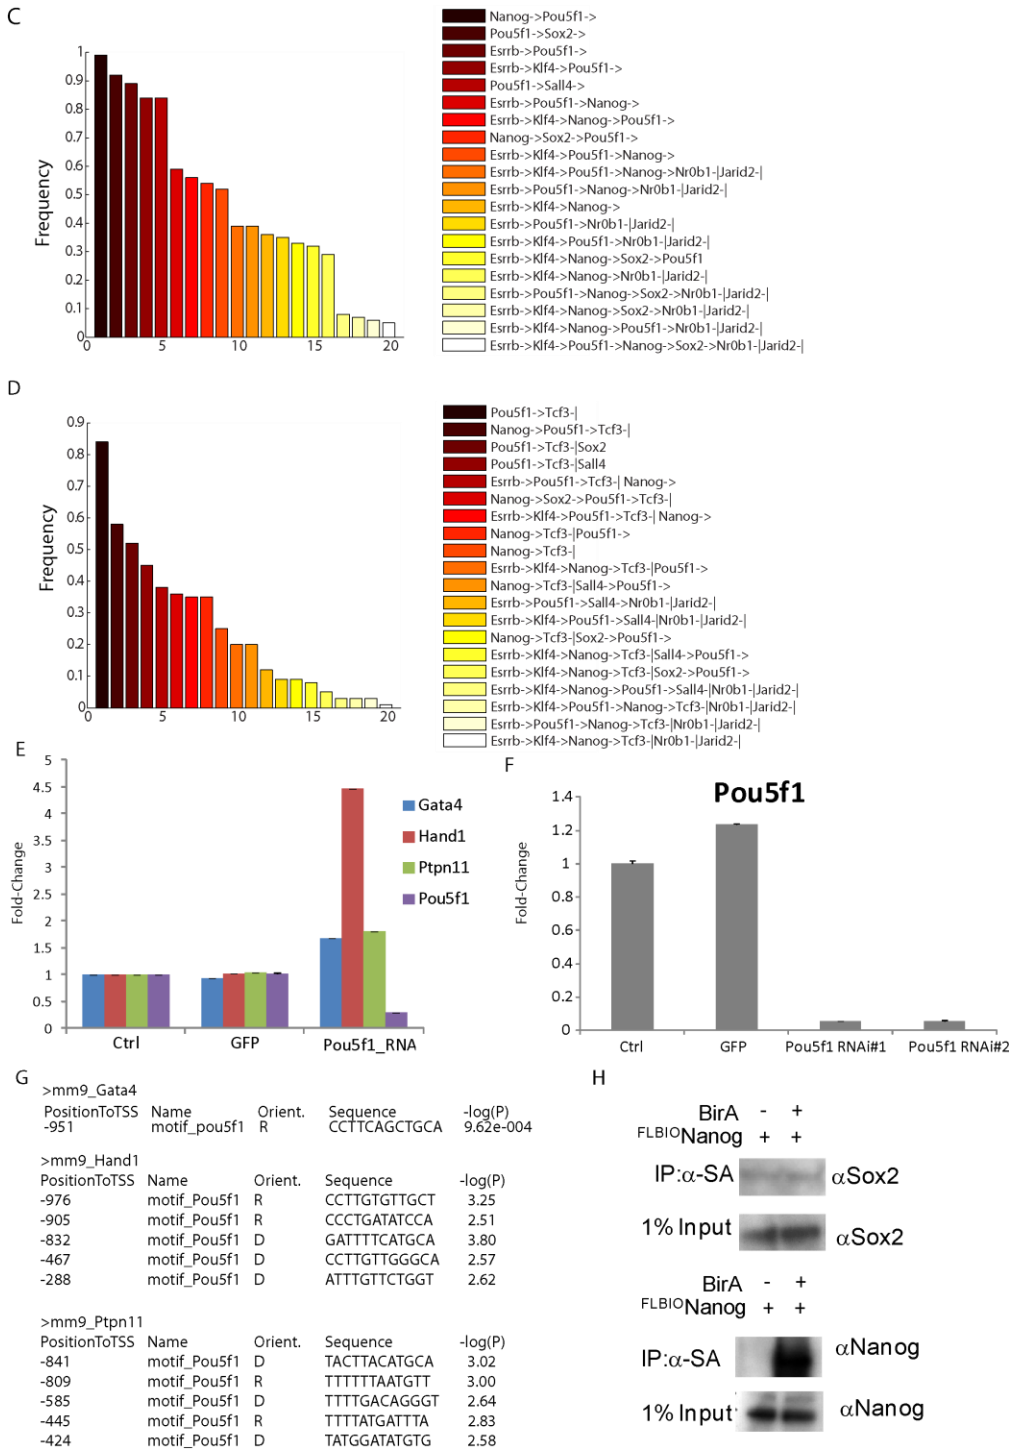

**Figure S3. Details of ensemble of learned networks and validation of novel interactions identified through the logic learning process**

(A) The network with learned logic consisting of 30 genes/proteins and inferred Boolean functions learned from the serum/LIF single cell data. Light cyan nodes represent genes; gray squares represent learned regulatory logic (as gates) with the inset shadowed box exemplifies one such learned transition function set upstream of *Gata6*. Links from upstream parent nodes appearing in more than 90% of equally well fitted Boolean functions are defined as ‘master links’ and highlighted in dark green (activation) and red (repression). Other links are colored in light green (activation) and pink (inhibition). The four novel links are highlighted in dark red.

(B) Selected examples of transition Boolean functions for 20 genes. Diamond heads are links from repressors whereas arrowheads are links from activators. Arrow thickness is proportional to the probability of upstream regulators to be involved in the best fitted Boolean functions. Arrow labels index the Boolean function. The sign — represents the logic operator ‘NOT’,  $\wedge$  represents ‘AND’ and  $\vee$  represents ‘OR’. Boolean functions for all genes are available in Supplementary Files 5-7. (C-D) Occurrence of individual positive (C) and negative (D) feedback loops in 100 sampled post-learning Boolean networks.  $\rightarrow$  indicates activation and  $\neg$  indicates repression. The sign of the link from the end node to start node is indicated by the symbol in the end of each legend. (E) Fold-changes

of gene expression of control and Oct4/Pou5f1-knockdown mESCs. ‘Ctrl’ represents empty-vector injected mESCs, ‘GFP’ represents GFP-vector injected mESCs and ‘Pou5f1\_RNAi’ represents Oct4/Pou5f1-shRNA injected mESCs. (F) Fold-changes of *Oct4/Pou5f1* expression of control and different shRNA knockdown mESCs. ‘Ctrl’ represents empty-vector injected mESCs, ‘GFP’ represents GFP-vector injected mESCs, “Pou5f1\_RNAi#1” represents shRNA#1 injected mESCs and “Pou5f1\_RNAi#2” represents shRNA#2 injected mESCs. (G) Potential binding sites for Oct4/Pou5f1 within the promoter region (-1kb from TSS) of *Gata4*, *Hand1*, *Ptpn11*. (H) Co-IP experiment testing Nanog-Sox2 interaction in mESCs nuclear extract from NGA2 (left lane) and NGB19 ESCs (right lane) were used for SA capture followed by western blotting with anti-Sox2 (upper) and Nanog (lower). NGA2 ESCs express Nanog proteins with Flag and biotin dual tag in Nanog null ESCs. The BirA transgene expressing biotin ligase was engineered into NGA2 ESCs to obtain NGB19 ESCs. The result from this experiment shows that we could not detect a physical interaction between these factors.
