# Supplementary material for: Construction and Validation of a Regulatory Network for Pluripotency and Self-Renewal of Mouse Embryonic Stem Cells
Source: PLOS journal article supplement (doi:10.1371/journal.pcbi.1003777), 2014-08-14
Supplement: S5 (10.1371/journal.pcbi.1003777.s005) [file journal.pcbi.1003777.s005]

A

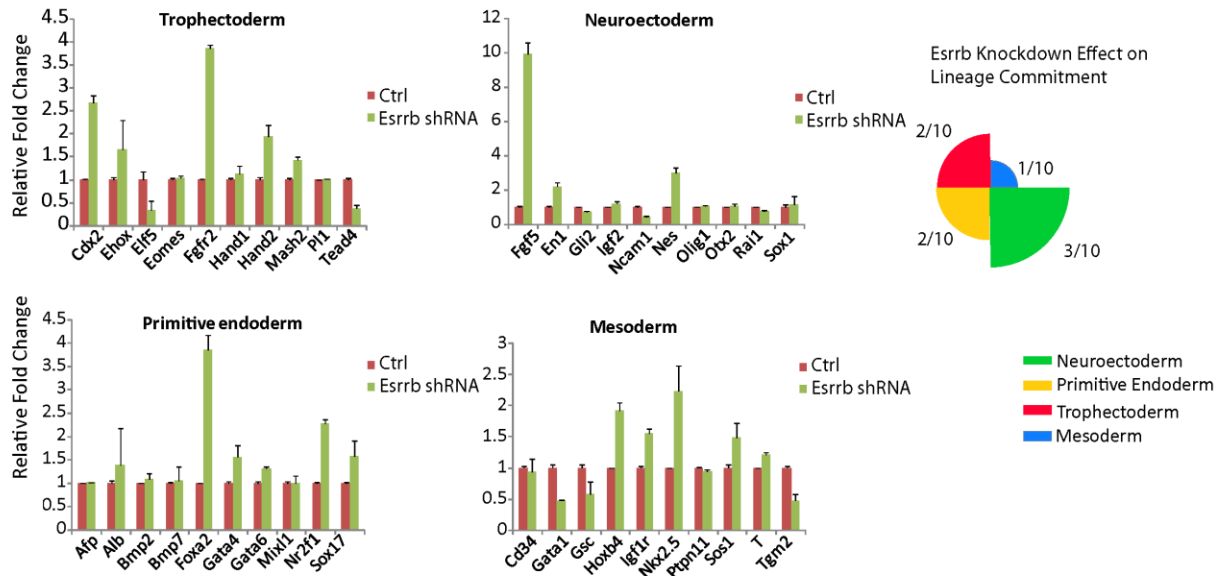

B

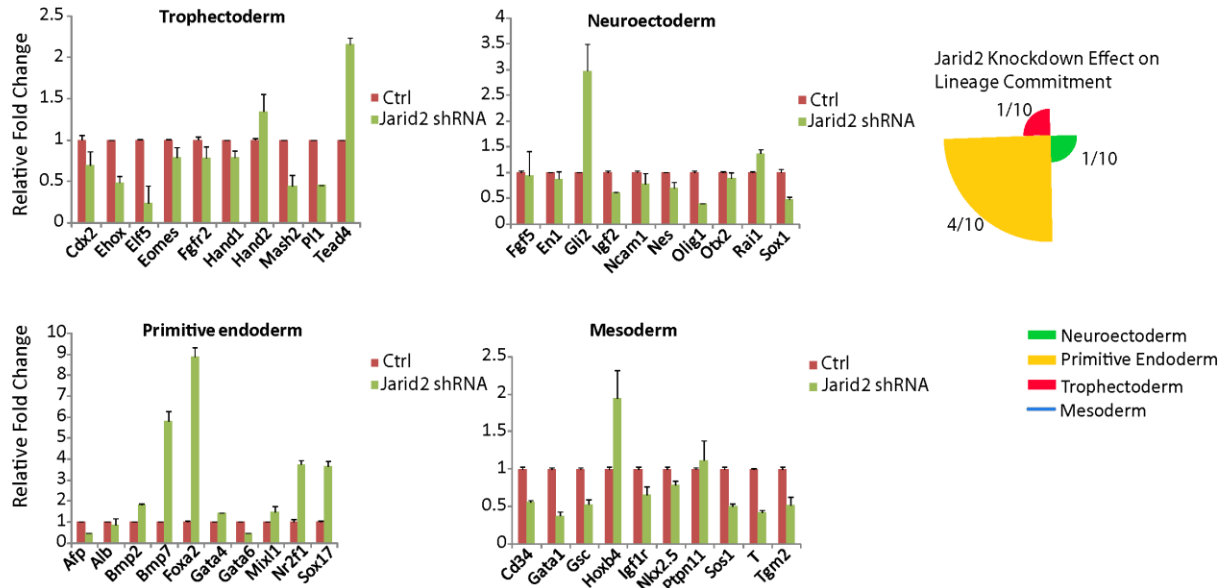

**Figure S5. Expression measurements of lineage specification markers after knockdowns in mESCs**

Plots show the relative fold-change for 40 lineage marker genes after knockdowns by Esrrb-shRNA (A) and Jarid2-shRNA (B). Pie charts display each slice with radius proportional to the number of lineage specific genes with more than two fold-changes as compared with the controls. All values were normalized by the expression of *Gapdh*.
