# Supplementary material for: Construction and Validation of a Regulatory Network for Pluripotency and Self-Renewal of Mouse Embryonic Stem Cells
Source: PLOS journal article supplement (doi:10.1371/journal.pcbi.1003777), 2014-08-14
Supplement: S13 (10.1371/journal.pcbi.1003777.s013) [file journal.pcbi.1003777.s013]

| Gene Name | Out-degree (serum) | Out-degree (2i) |
|-----------|--------------------|-----------------|
| Esrrb     | 4                  | 6               |
| Klf4      | 4                  | 3               |
| Myc       | 0                  | 0               |
| Nanog     | 6                  | 6               |
| Nr0b1     | 2                  | 2               |
| Pou5f1    | 15                 | 13              |
| Sall4     | 1                  | 1               |
| Sox2      | 6                  | 8               |
| Stat3     | 1                  | 1               |
| Tbx3      | 1                  | 1               |
| Tcf3      | 5                  | 7               |
| Zfp281    | 1                  | 0               |
| Zfp42     | 1                  | 1               |
| Zfx       | 2                  | 2               |
| Jarid2    | 1                  | 0               |

**Table S6. Out-degree centrality measures in terms of critical links of nodes in the ensemble, representative networks of mESCs in serum/LIF and 2i/LIF**
