# Supplementary material for: Construction and Validation of a Regulatory Network for Pluripotency and Self-Renewal of Mouse Embryonic Stem Cells
Source: PLOS journal article supplement (doi:10.1371/journal.pcbi.1003777), 2014-08-14
Supplement: S14 (10.1371/journal.pcbi.1003777.s014) [file journal.pcbi.1003777.s014]

(A)

| Interacting Protein A | Interacting Protein B | 'AND' Gate |
|-----------------------|-----------------------|------------|
| Esrrb                 | Pou5f1                | 1          |
| Esrrb                 | Sall4                 | 1          |
| Esrrb                 | Nr0b1                 | 1          |
| Esrrb                 | Nanog                 | 1          |
| Esrrb                 | Sox2                  | 1          |
| Klf4                  | Pou5f1                | 1          |
| Klf4                  | Sox2                  | 1          |
| Nanog                 | Pou5f1                | 1          |
| Nanog                 | Zfp281                | 0          |
| Nanog                 | Nr0b1                 | 1          |
| Nanog                 | Sall4                 | 1          |
| Nanog                 | Tbx3                  | 0          |
| Nanog                 | Sox2                  | 1          |
| Nr0b1                 | Pou5f1                | 1          |
| Nr0b1                 | Sall4                 | 0          |
| Pou5f1                | Sall4                 | 1          |
| Pou5f1                | Sox2                  | 1          |
| Pou5f1                | Zfp42                 | 0          |
| Sall4                 | Zfp281                | 0          |
| Sall4                 | Sox2                  | 1          |

(B)

| Rank | AND Connected ProteinA | AND Connected ProteinB | Frequency of Occurrence | Literature Support? | Reference                                    |                   |
|------|------------------------|------------------------|-------------------------|---------------------|----------------------------------------------|-------------------|
|      |                        |                        |                         |                     | Large-scale IP-MS                            | Small-scale co-IP |
| 1    | Esrrb                  | Sox2                   | 4.83E-02                | Yes                 | 22334693;                                    |                   |
| 2    | Nanog                  | Sox2                   | 4.53E-02                | Yes                 | 21589869;22334693;                           |                   |
| 3    | Esrrb                  | Nanog                  | 3.91E-02                | Yes                 | 18957414;                                    | 17093407          |
| 4    | Pou5f1                 | Sox2                   | 2.76E-02                | Yes                 | 20362541;15863505;16978048;17324942;22334693 | 22334693          |
| 5    | Klf4                   | Sox2                   | 2.38E-02                | Yes                 | 22334693;                                    | 19816951          |
| 6    | Esrrb                  | Pou5f1                 | 2.38E-02                | Yes                 | 20362541;                                    | 18662995          |
| 7    | Esrrb                  | Tcf3                   | 2.30E-02                | No                  |                                              |                   |
| 8    | Sox2                   | Tcf3                   | 2.23E-02                | No                  |                                              |                   |
| 9    | Klf4                   | Nanog                  | 2.07E-02                | No                  |                                              |                   |
| 10   | Klf4                   | Sall4                  | 2.07E-02                | No                  |                                              |                   |

**Table S7. Relationship between protein pairs connected by 'AND' gate and literature evidence** (A) Summary of the known protein-protein interactions extracted from ESCAPE and whether supported by the 'AND' gate in the learned transition functions (indicated in the 3<sup>rd</sup> column by '1' for being connected by 'AND' and '0' otherwise). (B) Summary of the top 10 most frequent 'AND' connected pairs in all learned Boolean functions and with indication of supporting by known protein-protein interactions.
